# Supplementary material for: Diazonium-induced anchoring process: an application to improve the monovalent selectivity of cation exchange membranes
Source: Royal Society of Chemistry journal article supplement (doi:10.1039/b918915g), 2010-01-01
Supplement: b918915g.pdf [file b918915g.pdf]

## Supporting information

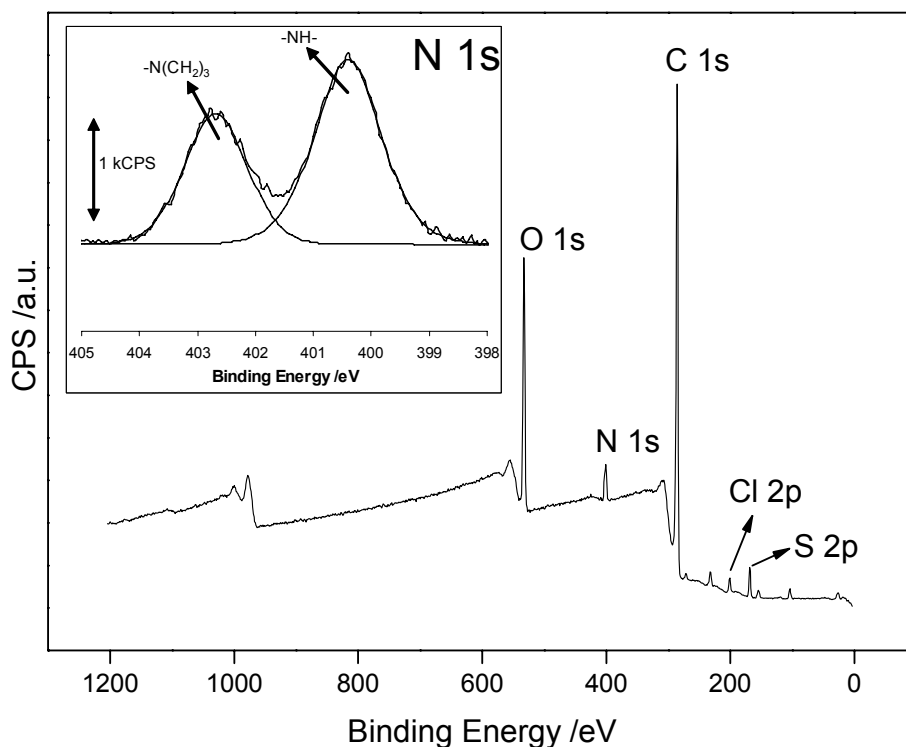

XPS survey spectrum and decomposed N 1s core level spectrum (inset) of the CMS commercial cation exchange membrane.

Table 1. Properties of the CMS commercial cation exchange membrane.

| Name                                                  | Neosepta CMS   |
|-------------------------------------------------------|----------------|
| Manufacturer                                          | Tokuyama Corp. |
| Type                                                  | Cation         |
| Thickness (mm)                                        | 0.145-0.150    |
| Water content (%)                                     | 22-30          |
| Exchange capacity (m equiv./g)                        | 2.20 ± 0.05    |
| Structure property                                    | PS/DVB         |
| Transport number of H <sup>+</sup>                    | 1.00           |
| Charged group                                         | Sulfonate      |
| Backbone                                              | PVC            |
| Density of dry membrane $\rho_d$ (g/cm <sup>3</sup> ) | 1.16 ± 0.10    |
| Density of wet membrane $\rho_m$ (g/cm <sup>3</sup> ) | 1.20 ± 0.10    |
